# Supplementary material for: Quantum chemical calculations on a selection of iodine-containing species (IO, OIO, INO3, (IO)2, I2O3, I2O4 and I2O5) of importance in the atmosphere
Source: Royal Society of Chemistry journal article supplement (doi:10.1039/b715687c), 2008-01-01
Supplement: b715687c.pdf [file b715687c.pdf]

**Supplementary information for Kaltsoyannis and Plane**

Table S1: B3LYP geometric data for NO<sub>2</sub>, NO<sub>3</sub> and INO<sub>3</sub> (planar). Bond lengths  $r$  in Å, bond and dihedral angles  $\angle$  in degrees. Atom numbers for INO<sub>3</sub> are given in Figure 1.

|                  | $r(\text{O1-I1})$ | $r(\text{O1-N1})$ | $r(\text{N1-O2})$ | $r(\text{N1-O3})$ | $\angle\text{I1O1N1}$ | $\angle\text{O1N1O2}$ | $\angle\text{O2N1O3}$ |
|------------------|-------------------|-------------------|-------------------|-------------------|-----------------------|-----------------------|-----------------------|
| NO <sub>2</sub>  |                   | 1.192             | 1.192             |                   |                       | 134.5                 |                       |
| NO <sub>3</sub>  |                   | 1.232             |                   |                   |                       | 120.0                 |                       |
| INO <sub>3</sub> | 2.023             | 1.452             | 1.198             | 1.195             | 117.8                 | 118.0                 | 131.5                 |

Table S2: B3LYP geometric data for I<sub>2</sub>O<sub>3</sub>. Bond lengths  $r$  in Å, bond and dihedral angles  $\angle$  in degrees. Atom numbers are given in Figure 2.

| $r(\text{I1-O1})$ | $r(\text{O1-I2})$ | $r(\text{I2-O2})$ | $r(\text{I2-O3})$ | $\angle\text{I1O1I2}$ | $\angle\text{O1I2O2}$ | $\angle\text{O1I2O3}$ | $\angle\text{O2I2O3}$ | $\angle\text{I1O1I2O2}$ | $\angle\text{I1O1I2O3}$ |
|-------------------|-------------------|-------------------|-------------------|-----------------------|-----------------------|-----------------------|-----------------------|-------------------------|-------------------------|
| 2.019             | 1.971             | 1.784             | 1.784             | 121.1                 | 102.5                 | 102.5                 | 108.1                 | 56.0                    | 56.0                    |

Table S3: B3LYP geometric data for I<sub>2</sub>O<sub>4</sub>. Bond lengths  $r$  in Å, bond and dihedral angles  $\angle$  in degrees. Atom numbers are given in Figure 3.

| $r(\text{O1-I1})$ | $r(\text{I1-O2})$ | $r(\text{O2-I2})$ | $r(\text{I2-O3})$ | $r(\text{I2-O4})$ | $\angle\text{O1I1O2}$ | $\angle\text{I1O2I2}$ | $\angle\text{O2I2O3}$ | $\angle\text{O2I2O4}$ | $\angle\text{O3I2O4}$ | $\angle\text{O1I1O2I2}$ | $\angle\text{I1O2I2O3}$ | $\angle\text{I2O2I2O4}$ |
|-------------------|-------------------|-------------------|-------------------|-------------------|-----------------------|-----------------------|-----------------------|-----------------------|-----------------------|-------------------------|-------------------------|-------------------------|
| 1.824             | 2.010             | 1.997             | 1.783             | 1.787             | 103.9                 | 123.1                 | 100.1                 | 99.3                  | 109.0                 | -93.1                   | -108.9                  | 2.5                     |

Table S4: B3LYP geometric data for I<sub>2</sub>O<sub>5</sub>. Bond lengths  $r$  in Å, bond and dihedral angles  $\angle$  in degrees. Atom numbers are given in Figure 4.

|                   |       |                       |       |                         |        |
|-------------------|-------|-----------------------|-------|-------------------------|--------|
| Variable          |       | Variable              |       | Variable                |        |
| $r(\text{O1-I1})$ | 1.779 | $\angle\text{O1I1O2}$ | 108.9 | $\angle\text{O1I1O3I2}$ | 173.5  |
| $r(\text{I1-O2})$ | 1.781 | $\angle\text{O1I1O3}$ | 96.2  | $\angle\text{O2I1O3I2}$ | -76.0  |
| $r(\text{I1-O3})$ | 2.019 | $\angle\text{O2I1O3}$ | 99.5  | $\angle\text{I1O3I2O4}$ | -120.4 |
| $r(\text{O3-I2})$ | 1.969 | $\angle\text{I1O3I2}$ | 123.7 | $\angle\text{I1O3I2O5}$ | -9.4   |
| $r(\text{I2-O4})$ | 1.779 | $\angle\text{O3I2O4}$ | 100.6 |                         |        |
| $r(\text{I2-O5})$ | 1.790 | $\angle\text{O3I2O5}$ | 99.6  |                         |        |

Supplementary Material for PCCP  
This journal is © The Owner Societies 2008

Table S5: B3LYP geometric data for I<sub>2</sub>, IO, OIO and three isomers of I<sub>2</sub>O<sub>2</sub>; IOIO, IOOI and OI(I)O. Bond lengths  $r$  in Å, bond and dihedral angles  $\angle$  in degrees. Experimental data (in italics) for I<sub>2</sub> and IO from *Thermodynamic Properties of Individual Substances*, Hemisphere, New York, 1989, and for O<sub>3</sub> from N. N. Greenwood and A. Earnshaw, *Chemistry of the Elements*, Pergamon Press, Oxford, 2<sup>nd</sup> edition, 1997.

|                 | $r(\text{I-I})$       | $r(\text{I-O})$       | $r(\text{O-O})$       | $r(\text{O-I})$ | $r(\text{I-O})$ | $\angle\text{OOO}$    | $\angle\text{IOI}$ | $\angle\text{OIO}$ | $\angle\text{IOO}$ | $\angle\text{OOI}$ | $\angle\text{OII}$ | $\angle\text{IOIO}$ | $\angle\text{IOOI}$ | $\angle\text{IIOO}$ |
|-----------------|-----------------------|-----------------------|-----------------------|-----------------|-----------------|-----------------------|--------------------|--------------------|--------------------|--------------------|--------------------|---------------------|---------------------|---------------------|
| I <sub>2</sub>  | 2.708<br><i>2.665</i> |                       |                       |                 |                 |                       |                    |                    |                    |                    |                    |                     |                     |                     |
| IO              |                       | 1.892<br><i>1.868</i> |                       |                 |                 |                       |                    |                    |                    |                    |                    |                     |                     |                     |
| OIO             |                       |                       |                       | 1.819           |                 |                       |                    | 110.5              |                    |                    |                    |                     |                     |                     |
| IO <sub>3</sub> |                       | 1.804                 |                       |                 |                 |                       |                    | 110.8              |                    |                    |                    |                     |                     |                     |
| O <sub>3</sub>  |                       |                       | 1.255<br><i>1.278</i> |                 |                 | 118.3<br><i>116.8</i> |                    |                    |                    |                    |                    |                     |                     |                     |
| IOIO<br>(chain) |                       | 2.029                 |                       | 1.994           | 1.828           |                       | 122.0              | 105.9              |                    |                    |                    | 73.7                |                     |                     |
| IOOI<br>(chain) |                       | 2.065                 | 1.384                 | 2.065           |                 |                       |                    |                    | 113.6              | 113.6              |                    |                     | 86.3                |                     |
| OI(I)O          | 2.823                 | 1.793                 |                       |                 | 1.793           |                       |                    |                    |                    |                    | 102.8              |                     |                     | 108.5               |

Table S6: B3LYP vibrational wavenumbers and point groups for all target systems.

|                                        |        |                                                   |       |                               |       |                                       |        |
|----------------------------------------|--------|---------------------------------------------------|-------|-------------------------------|-------|---------------------------------------|--------|
| <b>NO<sub>2</sub> (C<sub>2v</sub>)</b> |        | <b>I<sub>2</sub>O<sub>5</sub> (C<sub>1</sub>)</b> |       | <b>IOIO (C<sub>1</sub>)</b>   |       | <b>INO (C<sub>s</sub>)</b>            |        |
| A <sub>1</sub>                         | 766.2  | A                                                 | 36.2  | A                             | 64.3  | A'                                    | 233.2  |
| A <sub>1</sub>                         | 1385.6 | A                                                 | 48.1  | A                             | 224.5 | A'                                    | 512.4  |
| B <sub>2</sub>                         | 1688.0 | A                                                 | 59.9  | A                             | 328.6 | A'                                    | 1873.0 |
|                                        |        | A                                                 | 161.8 | A                             | 509.3 |                                       |        |
| <b>NO<sub>3</sub> (D<sub>3h</sub>)</b> |        | A                                                 | 174.5 | A                             | 534.9 | <b>ICN (C<sub>∞v</sub>)</b>           |        |
| E'                                     | 218.5  | A                                                 | 249.3 | A                             | 806.2 | Π                                     | 327.1  |
| A <sub>2</sub> "                       | 806.0  | A                                                 | 261.5 |                               |       | Σ                                     | 506.2  |
| E'                                     | 1096.5 | A                                                 | 297.6 | <b>OI(I)O (C<sub>1</sub>)</b> |       | Σ                                     | 2277.3 |
| A <sub>1</sub> '                       | 1126.0 | A                                                 | 313.5 | A                             | 138.6 |                                       |        |
|                                        |        | A                                                 | 459.4 | A                             | 146.3 | <b>I<sub>2</sub> (D<sub>∞h</sub>)</b> |        |
| <b>INO<sub>3</sub> (C<sub>s</sub>)</b> |        | A                                                 | 583.4 | A                             | 215.6 | Σ <sub>g</sub>                        | 214.6  |
| A"                                     | 97.7   | A                                                 | 866.1 | A                             | 285.9 |                                       |        |
| A'                                     | 181.0  | A                                                 | 881.3 | A                             | 847.6 | <b>IO (C<sub>∞v</sub>)</b>            |        |
| A'                                     | 368.2  | A                                                 | 905.3 | A                             | 882.4 | Σ                                     | 685.3  |
| A'                                     | 579.8  | A                                                 | 911.2 |                               |       |                                       |        |
| A'                                     | 729.4  |                                                   |       | <b>IOIO (C<sub>1</sub>)</b>   |       | <b>OIO (C<sub>2v</sub>)</b>           |        |

Supplementary Material for PCCP  
This journal is © The Owner Societies 2008

|                                                   |        |                                                   |       |                            |        |                                       |        |
|---------------------------------------------------|--------|---------------------------------------------------|-------|----------------------------|--------|---------------------------------------|--------|
| A''                                               | 752.2  | <b>I<sub>2</sub>O<sub>4</sub> (C<sub>1</sub>)</b> |       | A                          | 64.3   | A <sub>1</sub>                        | 264.4  |
| A'                                                | 824.3  | A                                                 | 34.5  | A                          | 125.8  | A <sub>1</sub>                        | 799.6  |
| A'                                                | 1311.4 | A                                                 | 66.3  | A                          | 220.5  | B <sub>2</sub>                        | 821.1  |
| A'                                                | 1716.2 | A                                                 | 92.6  | A                          | 433.0  |                                       |        |
|                                                   |        | A                                                 | 159.7 | A                          | 568.3  | <b>IO<sub>3</sub> (C<sub>1</sub>)</b> |        |
| <b>I<sub>2</sub>O<sub>3</sub> (C<sub>1</sub>)</b> |        | A                                                 | 239.2 | A                          | 804.0  | A                                     | 258.7  |
| A                                                 | 43.4   | A                                                 | 255.5 |                            |        | A                                     | 259.1  |
| A                                                 | 88.2   | A                                                 | 305.2 | <b>HI (C<sub>∞v</sub>)</b> |        | A                                     | 268.2  |
| A                                                 | 236.8  | A                                                 | 431.3 | Σ                          | 2318.7 | A                                     | 765.0  |
| A                                                 | 254.6  | A                                                 | 530.8 |                            |        | A                                     | 765.2  |
| A                                                 | 297.5  | A                                                 | 811.2 | <b>HOI (C<sub>s</sub>)</b> |        | A                                     | 795.3  |
| A                                                 | 442.5  | A                                                 | 868.2 | A'                         | 587.4  |                                       |        |
| A                                                 | 625.7  | A                                                 | 900.7 | A'                         | 1097.6 | <b>O<sub>3</sub> (C<sub>2v</sub>)</b> |        |
| A                                                 | 872.7  |                                                   |       | A'                         | 3791.3 | A <sub>1</sub>                        | 746.0  |
| A                                                 | 901.2  | <b>IOI (C<sub>2v</sub>)</b>                       |       |                            |        | B <sub>2</sub>                        | 1189.4 |
|                                                   |        | A <sub>1</sub>                                    | 127.6 |                            |        | A <sub>1</sub>                        | 1248.9 |
|                                                   |        | A <sub>1</sub>                                    | 443.0 |                            |        |                                       |        |
|                                                   |        | B <sub>2</sub>                                    | 619.6 |                            |        |                                       |        |
